# Supplementary material
Source: PubMed Central journal article supplement (PMC10240210)
Supplement: EMBR-24-e55764-s002.pdf [file EMBR-24-e55764-s002.pdf]

## Expanded View Figures

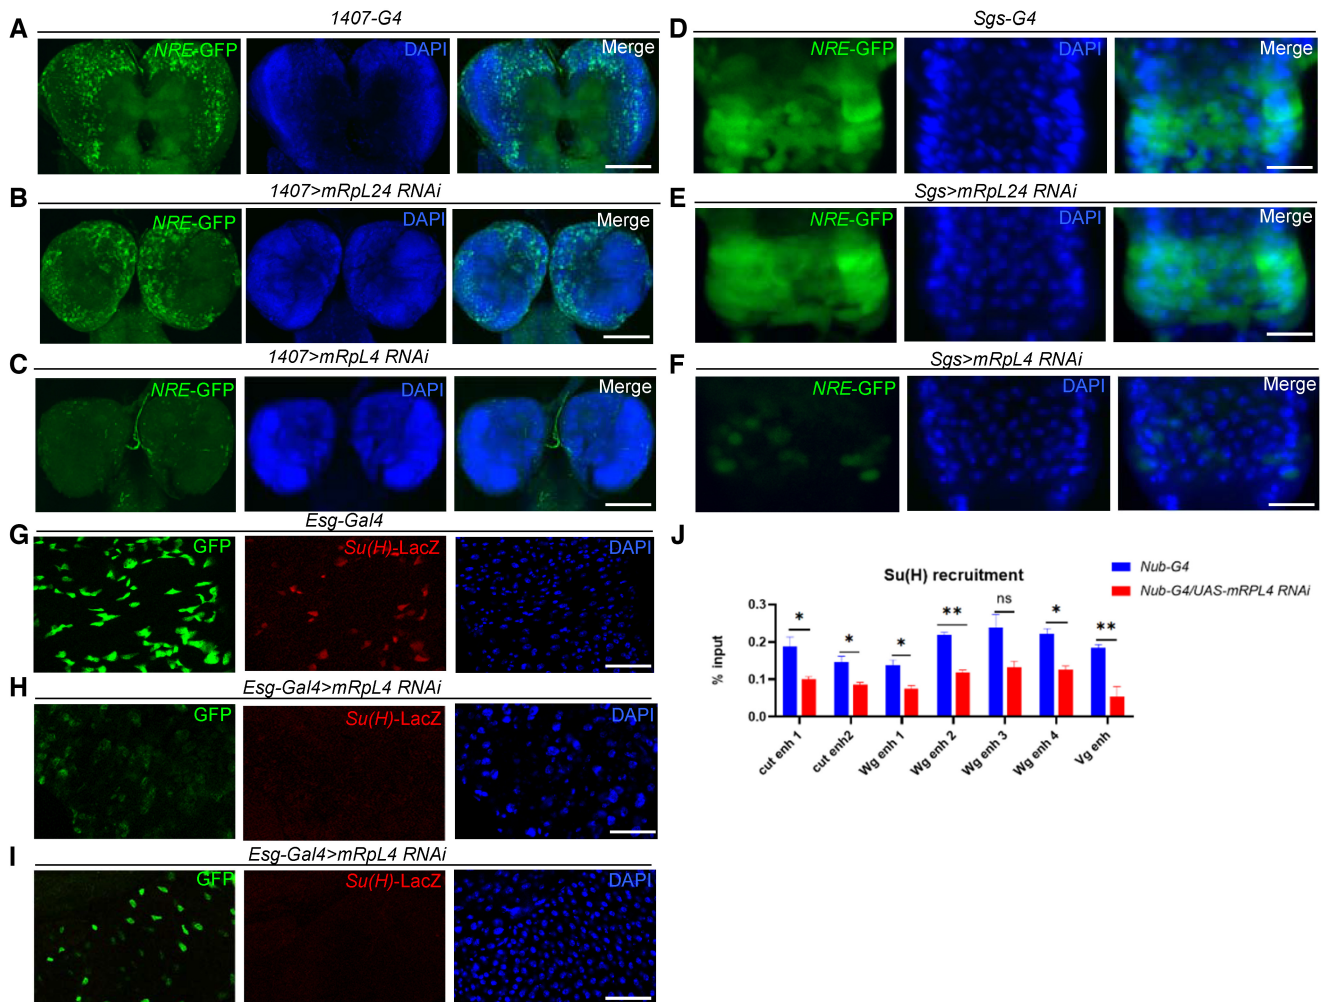

**Figure EV1. Effects of mRpl4 RNAi on Notch signal activity.**

A–C Representative image showing the expression of *NRE-GFP* in larval neuroblasts ( $n > 10$  larvae) of control (A), mRpl24 RNAi (B) and mRpl4 RNAi (C) larvae.

D–F Representative image showing the expression of *NRE-GFP* in salivary gland imaginal rings ( $n > 10$  larvae) of control (D), mRpl24 RNAi (E) and mRpl4 RNAi (F) larvae.

G–I Representative image showing the expression of *Su(H)-LacZ* in midgut cells ( $n > 10$  flies) of control (G) and mRpl4 RNAi (H, I) adult flies.

J The level of *Su(H)* occupancy at *Wg*, *Cut* and *Vg* genomic regions as assessed by qPCR following ChIP, from wild-type and *UAS-mRpl4-RNAi*-expressing wing disks. Data are presented as mean  $\pm$  SEM, two biological replicates for each genotype and three technical replicates for each sample. Statistical significance was tested using two-tailed unpaired t-test. \* $P < 0.05$ , \*\* $P < 0.01$ , ns means “not significant”.

Data information: Scale bars = 100  $\mu$ m.

**Figure EV2. Effects of overexpressing Notch signaling components.**

A–D Representative image of wing imaginal disks ( $n > 10$  wing disks) containing MARCM clones stained for *Wg*. Notch signaling ligand *Dl* is overexpressed in wild-type (A) or *mRpl4*<sup>K14608</sup> mutant (B) cells. Notch signaling ligand *Ser* is overexpressed in wild-type (C) or *mRpl4*<sup>K14608</sup> mutant (D) cells.

E–H Representative image of wing imaginal disks ( $n > 10$  wing disks) containing MARCM clones stained for NICD. Full-length Notch protein (*N<sup>F1</sup>*) (E), NEXT (F) and NICD (G) are overexpressed in *mRpl4*<sup>K14608</sup> mutant cells. Blank MARCM clones are generated in the wild-type wing disks (H).

Data information: The MARCM clones are marked by GFP and representative clones are marked by white arrows. Scale bars = 100  $\mu$ m.

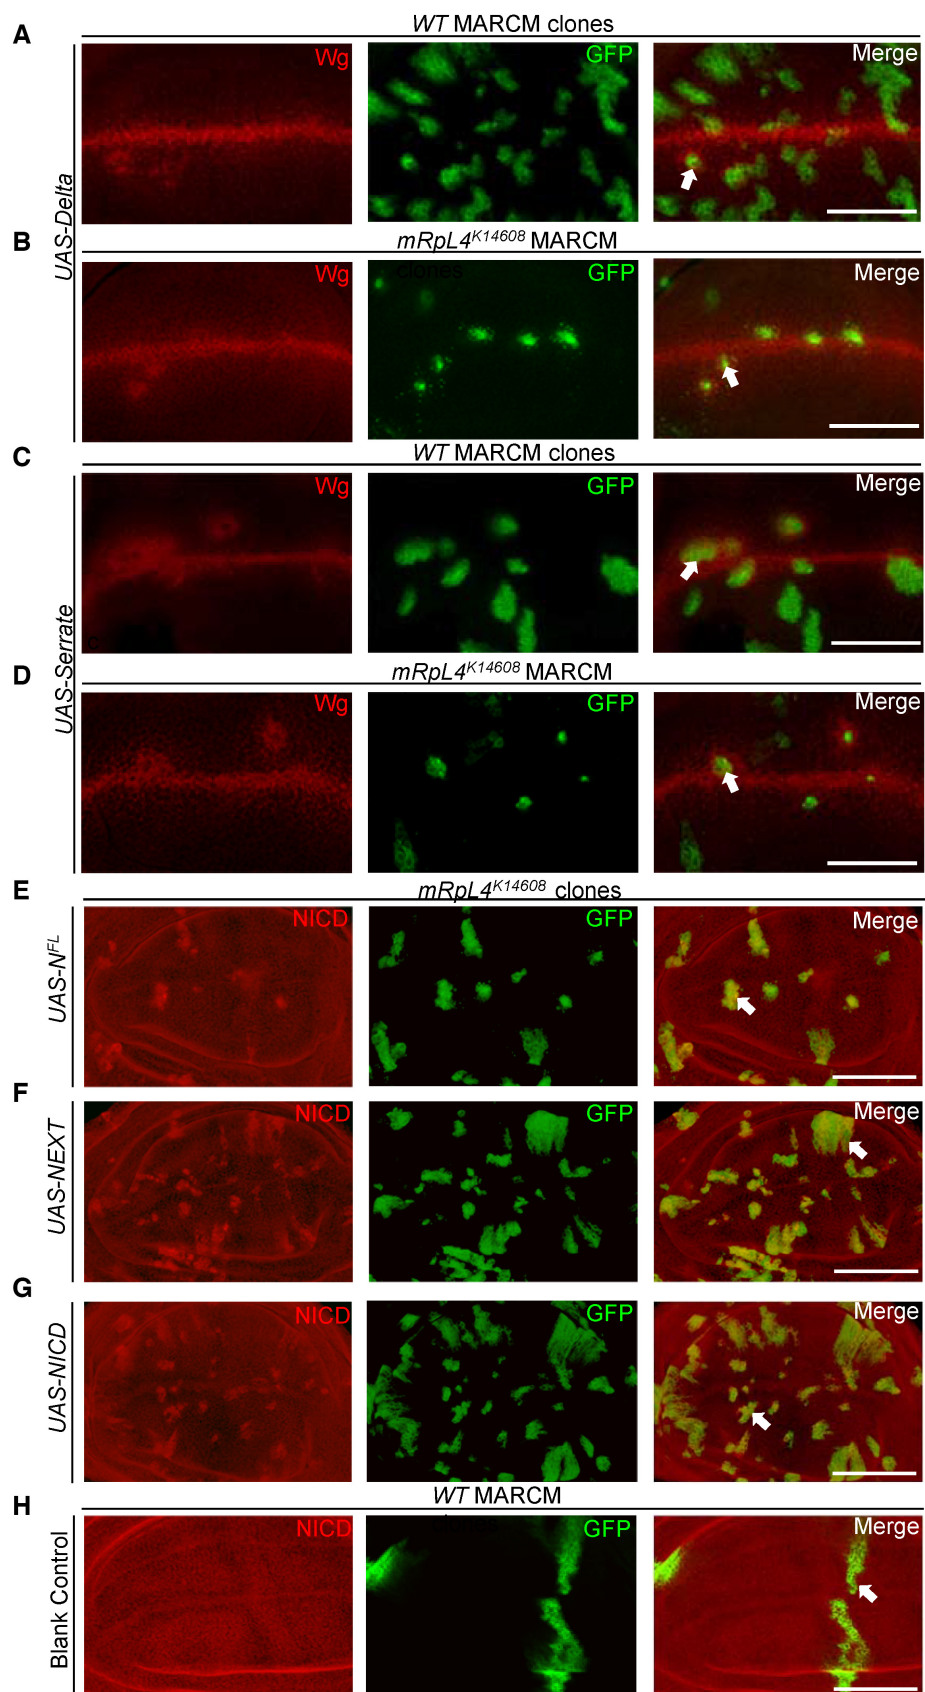

Figure EV2.

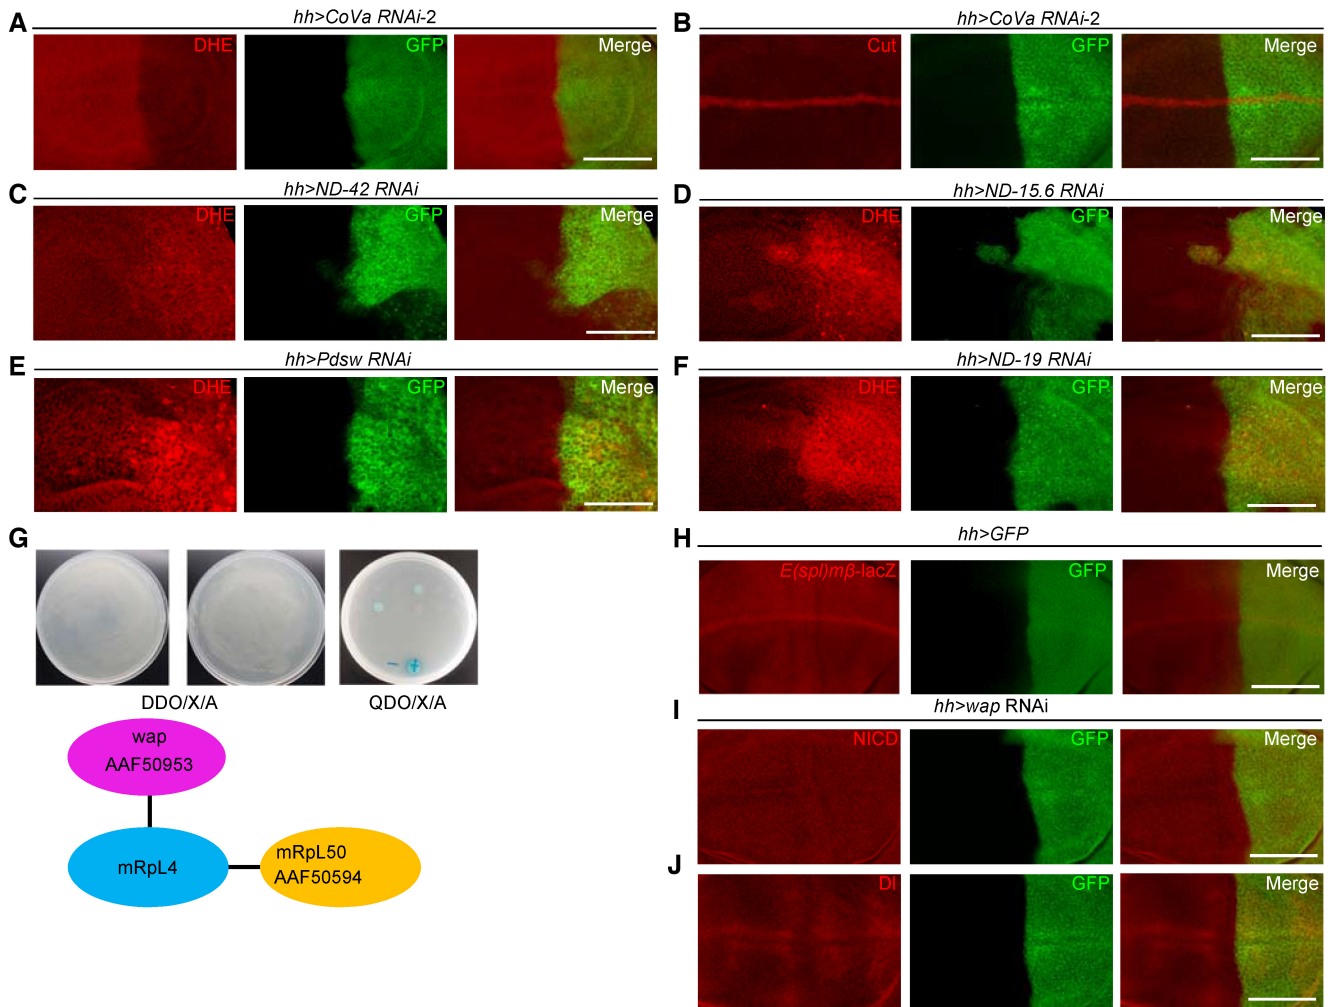

**Figure EV3. mRpl4 may regulate OXPPOS activity and Notch signaling through branched pathways.**

- A, B Representative images of wing imaginal disks ( $n > 15$  wing disks) expressing *CoVa* RNAi under the control of *hh-gal4* (marked by GFP) that are stained for DHE (A) and Cut (B).
- C–F Representative images of wing imaginal disks ( $n > 20$  wing disks) stained by DHE. The expression of *ND-42* (C), *ND-15.6* (D), *Pds* (E) and *ND-19* (F) RNAi are under the control of *hh-Gal4* (marked by GFP).
- G Two proteins, mRpl50 and wap are isolated as mRpl4 interaction partners through yeast two-hybridization. The GenBank accession numbers assigned to mRpl50 and wap are AAF50594 and AAF50953.
- H Representative image of wing imaginal disks ( $n > 15$  wing disks) showing *E(spl)mβ-LacZ* expression pattern, and cells in the posterior compartment are marked by GFP.
- I, J Representative image of wing imaginal disks ( $n > 15$  wing disks) stained for NICD (I) and DI (J). In these wing disks, *wap* RNAi are expressed under the control of *hh-Gal4* (marked by GFP).

Data information: Scale bars = 100  $\mu$ m.



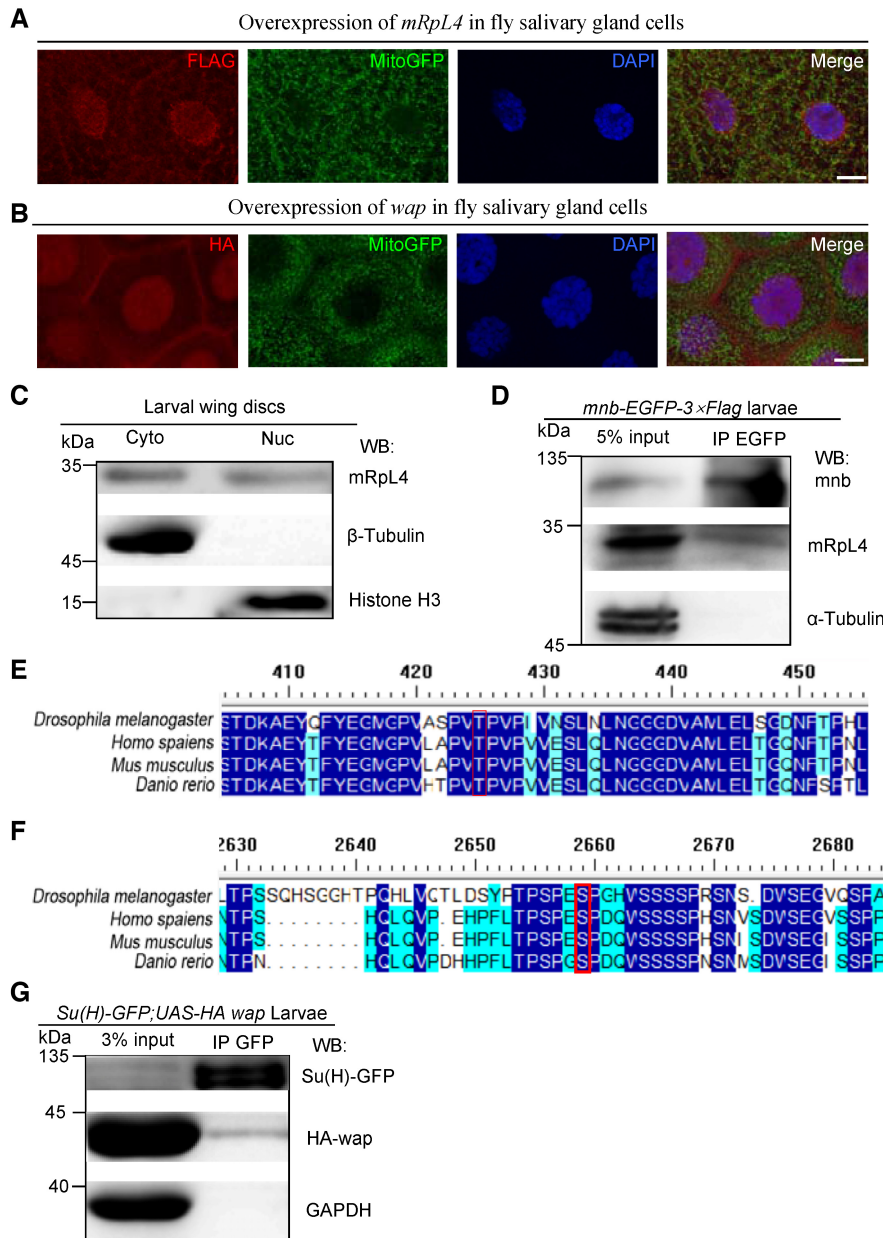

**Figure EV4. mRpL4 and wap may function through Su(H) to regulate Notch signaling.**

A, B Representative images of third instar larvae salivary glands ( $n > 10$  larvae) from flies expressing FLAG-tagged mRpL4 (A) and HA-tagged wap (B). Immunostaining was performed using anti-FLAG and anti-HA antibodies to reveal mRpL4 and wap, respectively. Mitochondria are marked by GFP and cell nuclei are labeled by DAPI.

C Representative western blotting ( $n = 3$  biological replicates) of mRpL4 protein distribution in cytoplasmic (Cyto) and nuclear (Nuc) fractions from wing discs lysates.

D Representative immunoprecipitation analysis ( $n = 3$  biological replicates) using lysates from wing discs expressing GFP-tagged mnb. Anti-GFP antibodies were used for immunoprecipitation. Western blotting was performed using anti-GFP and anti-mRpL4 antibodies to reveal mnb and mRpL4, respectively. α-Tubulin was used as control.

E Alignment of Su(H) protein sequences from fly, human, mice and zebrafish. The region covering the mnb phosphorylation consensus sequence is shown, and the conserved Thr residue (T426) is labeled by red box.

F Alignment of Notch protein sequences from fly, human, mice and zebrafish. The region covering the mnb phosphorylation consensus sequence is shown, and the conserved Ser residue (S2659) is labeled by red box.

G Representative immunoprecipitation analysis ( $n = 2$  biological replicates) using lysates from wing discs expressing GFP-tagged Su(H) and HA-tagged wap. Anti-GFP antibodies were used for immunoprecipitation. Western blotting was performed using anti-GFP and anti-HA antibodies to reveal Su(H) and wap, respectively. GAPDH was used as control.

Data information: Scale bars = 50 μm in (A and B). Source data are available online for this figure.
