# Supplementary material
Source: PubMed Central journal article supplement (PMC10240210)
Supplement: EMBR-24-e55764-s004.pdf [file EMBR-24-e55764-s004.pdf]

## Appendix: Mo et al

Table of contents:

|                          |     |
|--------------------------|-----|
| Appendix Table S1 .....  | 2-3 |
| Appendix Figure S1 ..... | 4-5 |
| Appendix Figure S2 ..... | 6-7 |

**Appendix Table S1: Sequences of primers used in this study**

**Primers for cDNA cloning**

| <b>Target</b>                  | <b>Sequence (5' - 3')</b>                              |
|--------------------------------|--------------------------------------------------------|
| <i>mRpL4</i> Forward           | ATGTTGAACAATATTTTAAA                                   |
| <i>mRpL4</i> Reverse           | CTAGACTTGATCCAGCTTAA                                   |
| <i>wap</i> Forward (HA tag)    | ATGtacccttacggtcctgattacgctagcctcTCCTCGAC<br>CGCCGGAAA |
| <i>wap</i> Reverse             | TTAGACCCGCAGGATCTC                                     |
| <i>human-mRpL4</i> Forward     | ATGCTGCAGTTCGTCCGGGC                                   |
| <i>human-mRpL4</i> Reverse     | CTAACAGCGGAGCCTGCACA                                   |
| <i>zebrafish-mRpL4</i> Forward | CGCTATCACGACCTTCCTGAC                                  |
| <i>zebrafish-mRpL4</i> Reverse | CCACTGAAGTCCATGCTGTTC                                  |
| <i>zebrafish-hey1</i> Forward  | GGATACGCGCTGCTAAACTGTC                                 |
| <i>zebrafish-hey1</i> Reverse  | TGGGACAAGCACAGTCGTTC                                   |

**Primers for ChIP qPCR**

| <b>Target</b>            | <b>Sequence (5' - 3')</b> |
|--------------------------|---------------------------|
| <i>mγ-mβ igr</i> Forward | GGAGTTGAGGAGTTGGTCG       |
| <i>mγ-mβ igr</i> Reverse | ATAAGTGTGGTTGGGTGCCT      |
| <i>mβ-tr</i> Forward     | AGAAGTGAGCAGCAGCCATC      |
| <i>mβ-tr</i> Reverse     | GCTGGACTTGAAACCGCACC      |
| <i>mβ-enh</i> Forward    | AGAGGTCTGTGCGACTTGG       |
| <i>mβ-enh</i> Reverse    | GGATGGAAGGCATGTGCT        |
| <i>mβ-mα igr</i> Forward | AAGCCAGTGGACTCTGCTCT      |
| <i>mβ-mα igr</i> Reverse | TGATCTCCAAGCGGAGTATG      |
| <i>mα-tr</i> Forward     | GCAGGAGGACGAGGAGGATG      |
| <i>mα-tr</i> Reverse     | GATCCTGGAATTGCATGGAG      |
| <i>m2-m3 igr</i> Forward | GCGCGTATTTCCCAAATAAA      |
| <i>m2-m3 igr</i> Reverse | GATTGTACGTGCATGGGAAA      |
| <i>m3-enh</i> Forward    | ACACACACAAACCCCATCC       |
| <i>m3-enh</i> Reverse    | CGAGGCAGTAGCCTATGTGA      |
| <i>m3-tr</i> Forward     | CGTCTGCAGCTCAATTAGTC      |
| <i>m3-tr</i> Reverse     | AGCCCACCCACCTCAACCAG      |
| <i>Cut enh Forward1</i>  | CCGATAAATCGGGGTTTTGGA     |
| <i>Cut enh Reverse1</i>  | ACGCCTGTTACCATAGTCGC      |
| <i>Cut enh Forward2</i>  | TTTGCCGACGTGAGAAACAC      |
| <i>Cut enh Reverse2</i>  | TCCTCCTTTTTCATACTTCATTAC  |
| <i>Wg enh Forward1</i>   | CCGTACTTTTTCCGGACCAC      |
| <i>Wg enh Reverse1</i>   | CGCTAAGCCCCTGTTTGGT       |
| <i>Wg enh Forward2</i>   | TGCTCCTCTGACCACGATCC      |

|                        |                         |
|------------------------|-------------------------|
| <i>Wg enh Reverse2</i> | CCTTAAGCCGCCTCGACTG     |
| <i>Wg enh Forward3</i> | CGCCGAAACATTTTCGAGAAACA |
| <i>Wg enh Reverse3</i> | CGTGACGCACAAGACCTTTA    |
| <i>Wg enh Forward4</i> | GCATTGCGCAACGTTTCGGT    |
| <i>Wg enh Reverse4</i> | AAATGTTTATTGACAGGCAGCGG |
| <i>Vg enh Forward1</i> | CCTCTCCCGCTTTTTGCTAAC   |
| <i>Vg enh Reverse1</i> | ACTGGACACTGGAAACCAGC    |

#### Primers for RT-qPCR assay

| Target                           | Sequence (5' - 3')     |
|----------------------------------|------------------------|
| <i>zebrafish-mRpL4</i> Forward   | TCAGATCTTCCAGTTGTGCG   |
| <i>zebrafish-mRpL4</i> Reverse   | GTTTGAAGTTCCGTTGCCAG   |
| <i>zebrafish-notch1a</i> Forward | CGACACCACACACACATGCT   |
| <i>zebrafish-notch1a</i> Reverse | AGTGGCAGTTGTAGGTGTTG   |
| <i>zebrafish-hey1</i> Forward    | GCCTTTGAGAAACAGGGCTCAG |
| <i>zebrafish-hey1</i> Reverse    | AGCGTGAGCATCAAAGTAACCT |
| <i>zebrafish-her4.1</i> Forward  | AGGAGAACTGAACACAAGACAC |
| <i>zebrafish-her4.1</i> Reverse  | TGCTGTTGATTCGCTCTCG    |
| <i>zebrafish-her6</i> Forward    | GGCTTCGGAACACAGAAAG    |
| <i>zebrafish-her6</i> Reverse    | TGACCCAAGCTTTCGTTGA    |
| <i>zebrafish-her15.1</i> Forward | TCGCTCTGCTCAGAGAAACA   |
| <i>zebrafish-her15.1</i> Reverse | ACCACTGGCTTTCGCAA      |
| <i>zebrafish-β-actin</i> Forward | ATCTTCACTCCCCTTGTTTAC  |
| <i>zebrafish-β-actin</i> Reverse | TCATCTCCAGCAAAACCGG    |

**Appendix Figure S1. Expression pattern of Notch signaling components.**

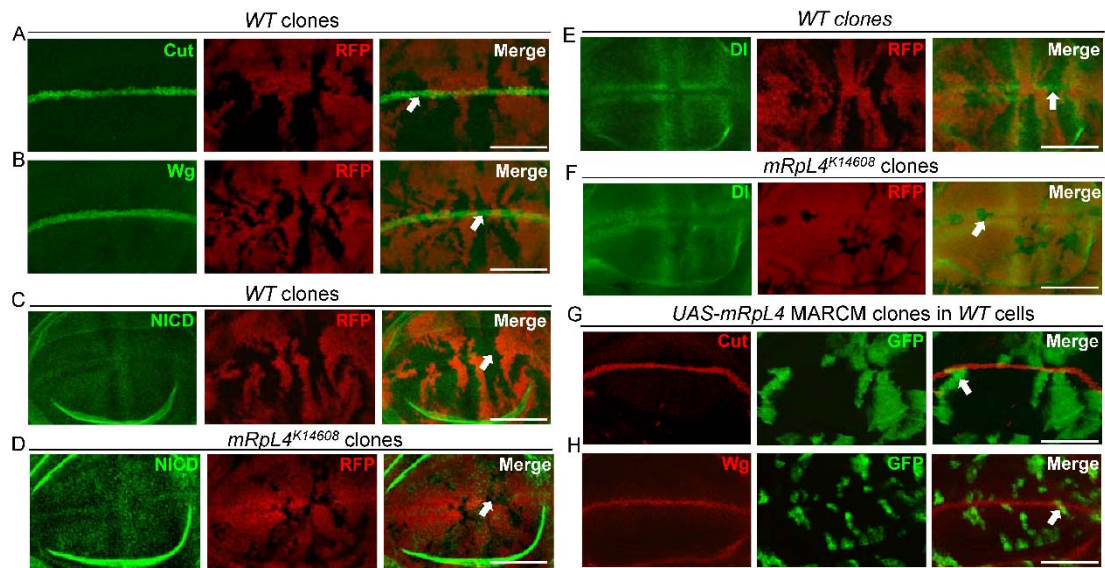

**A** Representative images of wing imaginal disc ( $n > 10$  wing discs) bearing wild type clones stained for Cut.

**B** Representative images of wing imaginal disc ( $n > 10$  wing discs) bearing wild type clones stained for Wg.

**C** Representative images of wing imaginal disc ( $n > 10$  wing discs) bearing wild type clones stained for NICD.

**D** Representative images of wing imaginal disc ( $n > 15$  wing discs) bearing *mRpl4*<sup>K14608</sup> clones stained for NICD.

**E** Representative images of wing imaginal disc ( $n > 15$  wing discs) bearing wild type clones stained for Dll.

**F** Representative images of wing imaginal disc ( $n > 15$  wing discs) bearing *mRpl4*<sup>K14608</sup> clones stained for Dll.

**G** Representative images of wild type wing imaginal disc ( $n > 10$  wing discs) bearing *UAS-mRpl4* MARCM clones stained for Cut.

**H** Representative images of wild type wing imaginal disc ( $n > 10$  wing discs) bearing

*UAS-mRpL4* MARCM clones stained for Wg.

Data information: Clones are marked by absence of RFP (*A-F*), while the MARCM clones are marked by GFP (*G* and *H*). Representative clones are marked by white arrows. Scale bars = 100  $\mu\text{m}$ .

Appendix Figure S2. Effects of MRPs knock-down.

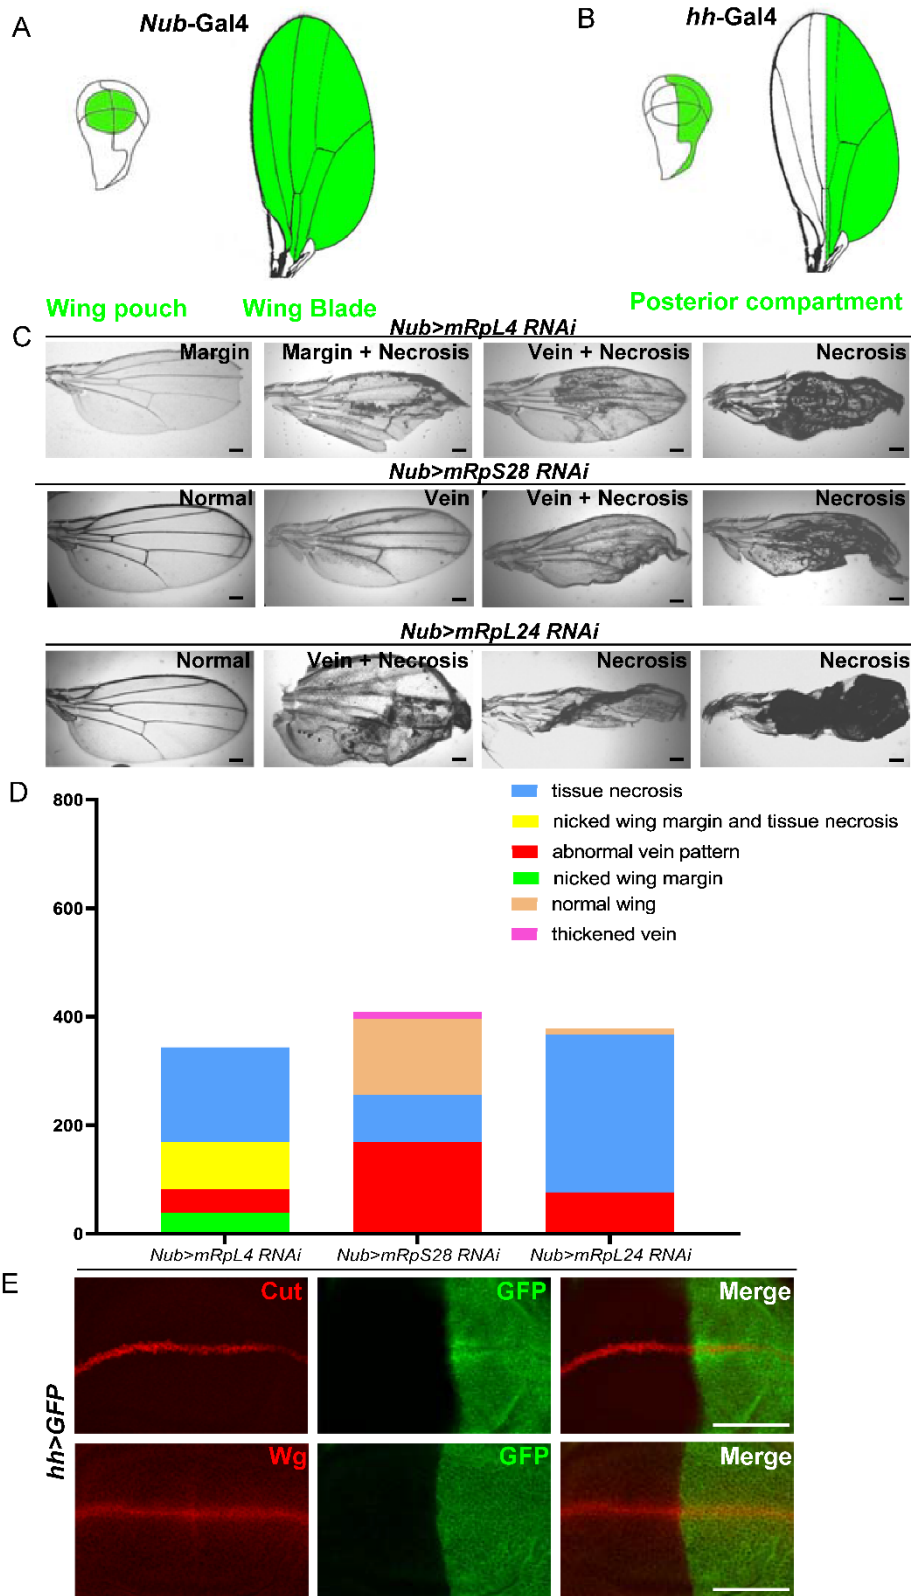

**A, B** Cartoons showing the areas where *Nub-Gal4* (*A*) and *hh-Gal4* (*B*) are active.

**C** Representative images of adult wings ( $n > 15$  wings) showing diverse defects upon

knock-down of *mRpL4*, *mRpS28* and *mRpL24* by *Nub*-Gal4 driven RNAi.

**D** Quantification of adult wing defects. mRpL4 RNAi led to wing margin nicks in 11.08% of the wings, and wing margin nicks along with tissue necrosis in 25.66% of the wings (n = 343). After knock-down mRpS28 (n = 408) or mRpL24 (n = 378) by RNAi, wing margin nicking defects were not observed.

**E** Representative images of wing imaginal disc ( $n > 15$  wing discs) expressing GFP under the control of *hh*-Gal4 stained for Cut and Wg.

Data information: Scale bars = 100  $\mu$ m.
