# Supplementary material
Source: PubMed Central journal article supplement (PMC10240210)

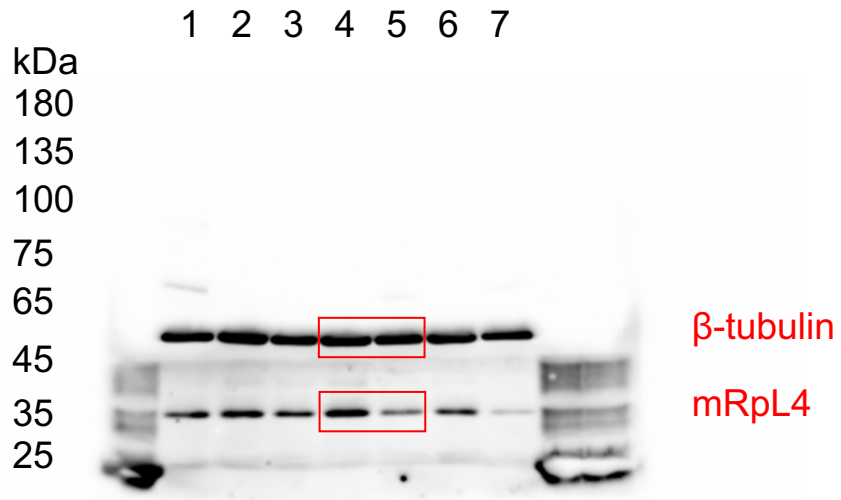

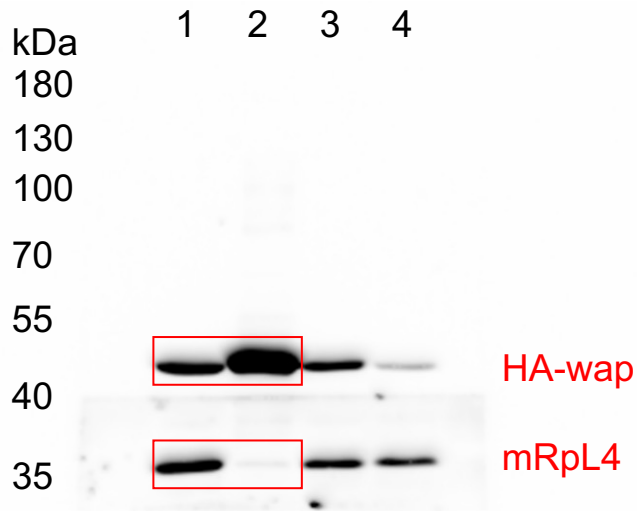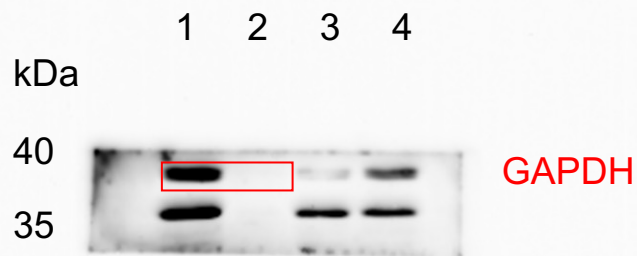

Supplement: EMBR-24-e55764-s001.pdf [file EMBR-24-e55764-s001.pdf]

Mo et al. Fig EV4C

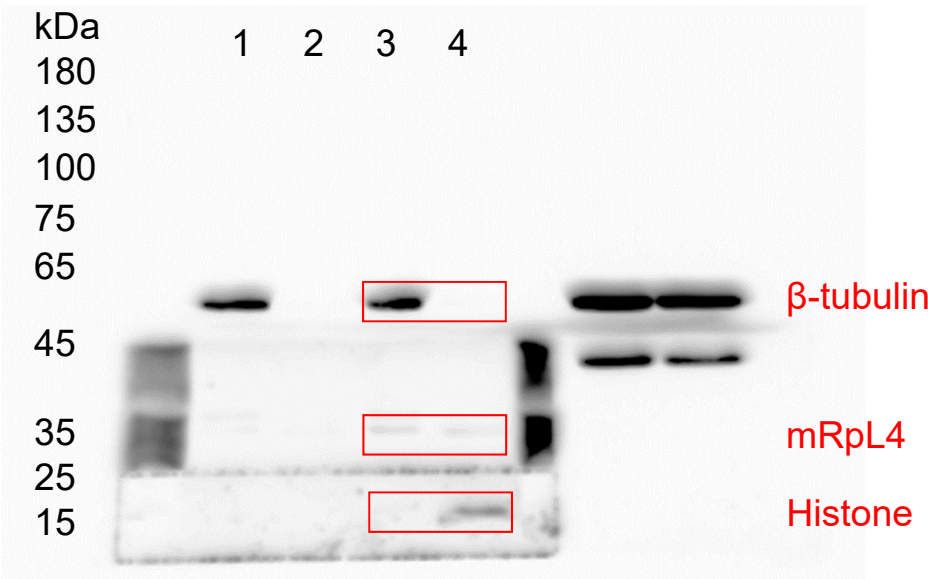

Mo et al. Fig EV4D

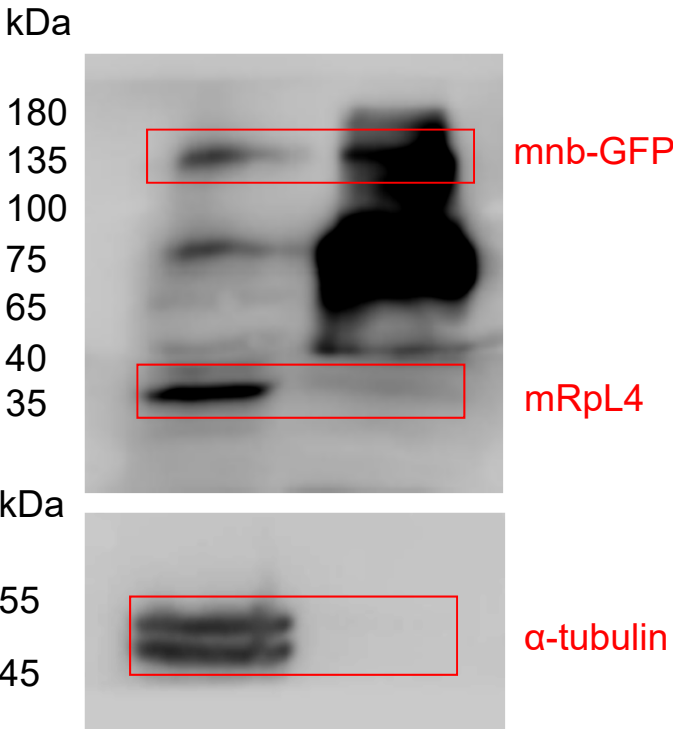

Mo et al. Fig EV4G

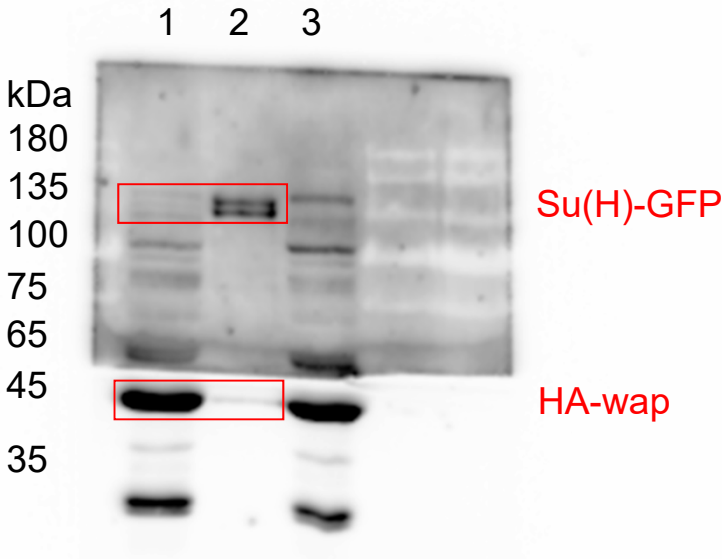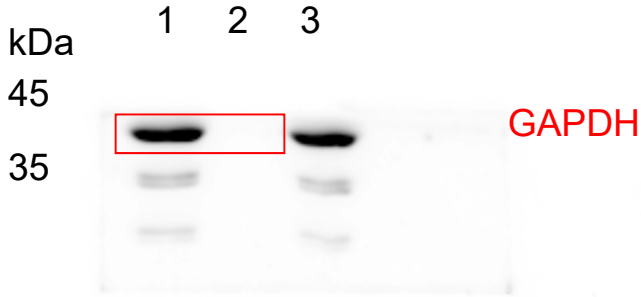

Supplement: EMBR-24-e55764-s006.pdf [file EMBR-24-e55764-s006.pdf]
